## The Atrial Fibrillation Better Care (ABC) pathway in atrial fibrillation: a systematic review and meta-analysis of 285,000 patients

Romiti GF.<sup>1</sup>; Pastori D.<sup>1</sup>; Rivera-Caravaca JM.<sup>2</sup>; Ding WY.<sup>3</sup>; Gue YX.<sup>3</sup>; Menichelli D.<sup>1</sup>; Gumprecht J.<sup>4</sup>; Koziel M.<sup>4</sup>; Yang PS.<sup>5</sup>; Guo Y.<sup>6</sup>; Lip GYH.<sup>3</sup>; Proietti M.<sup>7</sup>

<sup>1</sup>Sapienza University of Rome, Rome, Italy

<sup>2</sup>University of Murcia, Murcia, Spain

<sup>3</sup>University of Liverpool, Liverpool Centre for Cardiovascular Sciences, Liverpool, United Kingdom of Great Britain & Northern Ireland

<sup>4</sup>Silesian Center for Heart Diseases (SCHD), Department of Cardiology, Medical University of Silesia, Zabrze, Poland

<sup>5</sup>CHA University, Department of Cardiology, CHA Bundang Medical Center, Seongnam, Korea (Republic of)

<sup>6</sup>Chinese PLA General Hospital, Medical School of Chinese PLA, Department of Cardiology, Beijing, China

<sup>7</sup>University of Milan, Department of Clinical Sciences and Community Health, Milan, Italy

**Funding Acknowledgements:** Type of funding sources: None.

**Background:** The 'Atrial Fibrillation Better Care' (ABC) pathway has been recently proposed as a holistic approach for the comprehensive management of patients with Atrial Fibrillation (AF), standing on three main pillars: 'A' Avoid stroke (with Anticoagulants); 'B' Better symptom management; 'C' Cardiovascular and Comorbidity management. The ABC pathway is now recommended in several clinical guidelines, including the recent European Society of Cardiology (ESC) AF management guidelines. We performed a systematic review of the current evidence for use of the ABC pathway on clinical outcomes.

**Methods:** We performed a systematic review and meta-analysis according to PRISMA Guidelines. Pubmed and EMBASE were searched for studies reporting the prevalence of ABC pathway adherent management in AF patients, and its impact on clinical outcomes (all-cause death, cardiovascular death, stroke, and major bleeding). Metaanalysis of odds ratio (OR) was performed with random-effect models; subgroup analysis and meta-regression were performed to account for heterogeneity; a CHA2DS2-VASc-stratified sensitivity analysis was also performed.

**Results:** Among 2862 records retrieved from the literature search, 8 studies were included. The pooled prevalence of ABC adherent management was 21% (95% confidence intervals (CI), 13-34%), with a high grade of heterogeneity; in a multivariable meta-regression model, adherence to each criteria of the ABC pathway explained most part of the heterogeneity ( $R^2 = 98.9\%$ ). Patients treated according to the ABC pathway showed a lower risk of all-cause death (OR:0.42, 95%CI 0.31-0.56), cardiovascular death (OR:0.37, 95%CI 0.23-0.58), stroke (OR:0.55, 95%CI 0.37-0.82) and major bleeding (OR:0.69, 95%CI 0.51-0.94), with moderate heterogeneity. Meta-regressions showed that the increasing prevalence of diabetes mellitus, coronary artery disease, chronic heart failure and history of stroke were associated with a reduced effectiveness of the ABC pathway for all-cause and cardiovascular death; each comorbidity was able to explain a significant proportion of heterogeneity at univariate meta-regression. Conversely, longer follow-up time was associated with more effectiveness of the ABC pathway for all outcomes. Adherence to ABC pathway was associated with a progressively greater reduction of the all-cause death risk amongst patients with higher CHA2DS2-VASc scores; no difference in ABC pathway effectiveness was found across CHA2DS2-VASc strata for CV death and stroke occurrence.

**Conclusions:** Adherence to the ABC pathway was suboptimal, being adopted in 1 in every 5 patients. Adherence to the ABC pathway was associated with a reduction in the risk of major adverse outcomes. Our data supports extensive application of the ABC pathway for the management of AF.

Abstract Figure.

The 'Atrial Fibrillation Better Care' (ABC) Pathway in Atrial Fibrillation:  
A Systematic Review and Meta-Analysis of 285,000 Patients

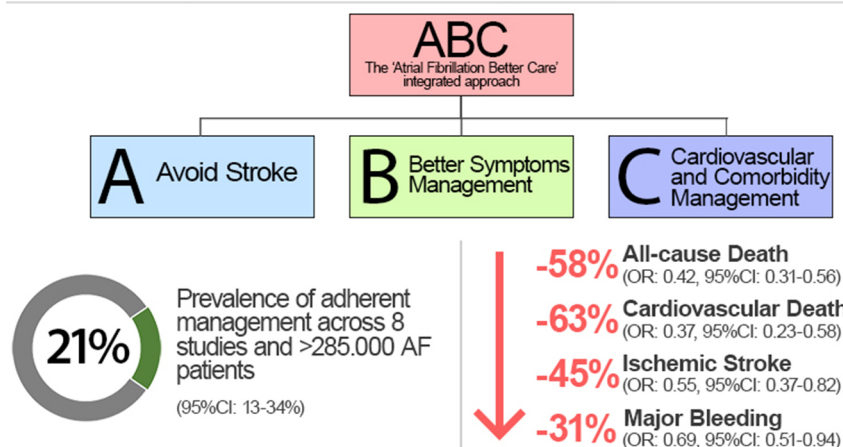

Source: http://academic.oup.com/europace/article-pdf/23/Supplement_3/euab116.290/38131746/euab116.290.pdf
